# Supplementary material
Source: Springer Nature journal article supplement (https://www.springermedizin.de/resource/supplementary/12885_2014_5104_MOESM4_ESM.pdf/9468452)

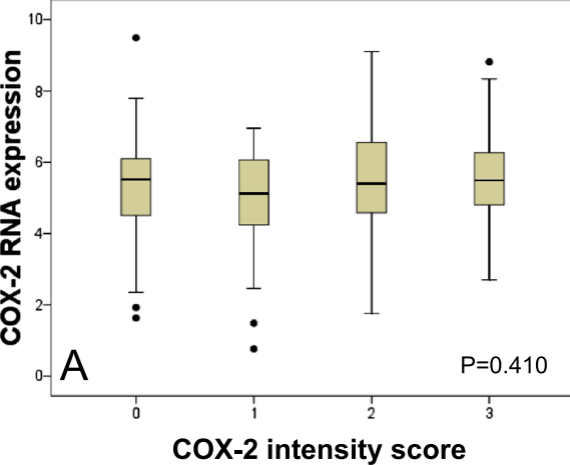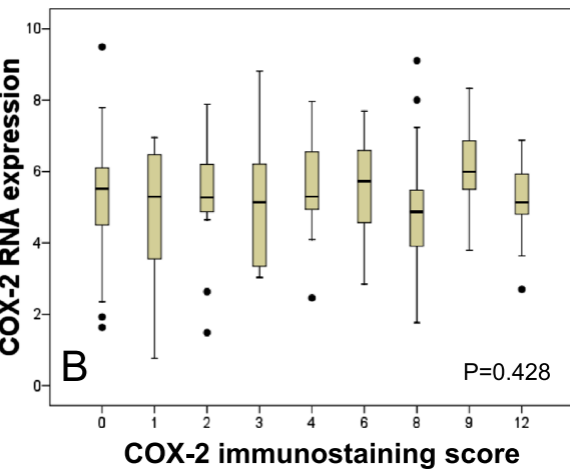

Supplement: MOESM4 [file 9468452]
